# Supplementary material
Source: publisher figshare collection journal article supplement (https://sage.figshare.com/ndownloader/files/13095650)
Supplement: Supplementary file 1 [file 13095650]

## **SUPPLEMENTARY TABLES**

### **Short- and long-term outcome after out-of-hospital cardiac arrest in patients aged 75 years and older**

Bart Hiemstra\*<sup>1</sup>, MD, Remco Bergman\*<sup>1,2</sup> MD, Anthony R Absalom<sup>2</sup> MBChB, FRCA, MD, PhD,

Joukje van der Naalt<sup>3</sup> MD, PhD, Pim van der Harst<sup>4</sup> MD, PhD, Ronald de Vos<sup>2,5</sup> MD, Wybe

Nieuwland<sup>4</sup> MD, PhD, Maarten W Nijsten<sup>1</sup> MD, PhD, Iwan CC van der Horst<sup>1</sup> MD, PhD

1. Department of Critical Care,

2. Department of Anesthesiology,

3. Department of Neurology,

4. Department of Cardiology.

1 – 4 all affiliated to: University of Groningen, University Medical Center Groningen,

5. Regional Ambulance Services, Groningen, the Netherlands

## INDEPENDENT PREDICTORS OF DIAGNOSTICS AND TREATMENT

**eTable1. Multivariable logistic regression with predictors for undergoing coronary angiography in elderly patients**

| Variable                                  | Odds ratio | 95% CI      | P-value |
|-------------------------------------------|------------|-------------|---------|
| <i>Coronary angiography</i>               |            |             |         |
| Shockable rhythm as initial rhythm        | 4.14       | 1.20 – 14.3 | 0.024   |
| ST-segment elevation on electrocardiogram | 12.1       | 3.56 – 41.1 | <0.001  |
| pH at admission                           | 54.3       | 1.11 – 2643 | 0.044   |

Only elderly patients ( $\geq 75$  years) were included. The model included 112 patients of which 36 underwent coronary angiography. Logistic regression:  $R^2=0.32$  (Cox&Snell), 0.45 (Nagelkerke), Hosmer-Lemeshow goodness-of-fit test  $\chi^2 3.66$ ,  $P=0.887$ . Area under the receiver operation curve = 0.850. Abbreviations: CI, confidence interval.

**eTable2a. Multivariable logistic regression with predictors for percutaneous coronary intervention in younger patients**

| Variable                                             | Odds ratio | 95% CI      | P-value |
|------------------------------------------------------|------------|-------------|---------|
| <i>Coronary angiography</i>                          |            |             |         |
| ST-segment elevation on electrocardiogram            | 16.6       | 9.48 – 28.9 | <0.001  |
| Creatinine kinase-myocardial band level at admission | 1.00       | 1.00 – 1.00 | <0.001  |

Only younger patients ( $< 75$  years) were included. The model included 400 patients of which 182 underwent percutaneous coronary intervention. Logistic regression:  $R^2= 0.39$  (Cox&Snell), 0.53 (Nagelkerke), Hosmer-Lemeshow goodness-of-fit test  $\chi^2 6.51$ ,  $P=0.590$ . Area under the receiver operation curve = 0.866. Abbreviations: CI, confidence interval.

**eTable2b. Multivariable logistic regression with predictors for percutaneous coronary intervention in elderly patients**

| Variable                                             | Odds ratio | 95% CI      | P-value |
|------------------------------------------------------|------------|-------------|---------|
| <i>Coronary angiography</i>                          |            |             |         |
| ST-segment elevation on electrocardiogram            | 21.9       | 6.15 – 77.7 | <0.001  |
| Creatinine kinase-myocardial band level at admission | 1.01       | 1.00 – 1.01 | 0.011   |

Only elderly patients ( $\geq 75$  years) were included. The model included 117 patients of which 30 underwent percutaneous coronary intervention. Logistic regression:  $R^2= 0.39$  (Cox&Snell), 0.57 (Nagelkerke), Hosmer-Lemeshow goodness-of-fit test  $\chi^2 3.84$ ,  $P=0.871$ . Area under the receiver operation curve = 0.892. Abbreviations: CI, confidence interval.

**eTable3. Multivariable logistic regression with predictors for receipt of mild therapeutic hypothermia in elderly patients**

| Variable                                             | Odds ratio | 95% CI      | P-value |
|------------------------------------------------------|------------|-------------|---------|
| <i>Mild therapeutic hypothermia</i>                  |            |             |         |
| Shockable rhythm as initial rhythm                   | 3.94       | 1.52 – 10.3 | 0.005   |
| Creatinine kinase-myocardial band level at admission | 1.00       | 1.00 – 1.01 | 0.006   |

Only elderly patients ( $\geq 75$  years) were included. The model included 121 patients of which 40 underwent mild therapeutic hypothermia. Logistic regression:  $R^2=0.19$  (Cox&Snell), 0.27 (Nagelkerke), Hosmer-Lemeshow goodness-of-fit test  $\chi^2 7.65$ ,  $P=0.469$ . Area under the receiver operation curve = 0.788. Abbreviations: CI, confidence interval.

## INDEPENDENT PREDICTORS OF IN-HOSPITAL MORTALITY

**eTable4. Multivariable logistic regression with predictors of in-hospital mortality**

| Variable                          | Odds ratio | 95% CI      | P-value |
|-----------------------------------|------------|-------------|---------|
| Elderly patients (> 75 years)     | 2.76       | 1.60 – 4.79 | <0.001  |
| Sex female                        | 1.03       | 0.64 – 1.66 | 0.910   |
| Initial rhythm of PEA or asystole | 2.44       | 1.39 – 4.27 | 0.002   |
| Received basic life support       | 0.43       | 0.27 – 0.68 | <0.001  |
| Witnessed arrest                  | 0.42       | 0.23 – 0.79 | 0.007   |
| Glucose at admission              | 1.09       | 1.04 – 1.14 | 0.001   |
| pH at admission                   | 0.06       | 0.01 – 0.23 | <0.001  |
| Prior cardiovascular disease      | 0.86       | 0.54 – 1.37 | 0.532   |

All patients had return of spontaneous circulation. The model included 469 patients of which 226 died. Logistic regression:  $R^2=0.26$  (Cox&Snell), 0.35 (Nagelkerke), Hosmer-Lemeshow goodness-of-fit test  $\chi^2$  12.64,  $P=0.125$ . Abbreviations: CI, confidence interval; PEA, pulseless electric activity.

**eTable5. Multivariable logistic regression with predictors of in-hospital mortality in elderly patients including Glasgow coma scale at admission**

| Variable                          | Odds ratio  | 95% CI             | P-value          |
|-----------------------------------|-------------|--------------------|------------------|
| <i>In-hospital mortality</i>      |             |                    |                  |
| Sex female                        | 0.75        | 0.19 – 2.95        | 0.682            |
| Initial rhythm of PEA or asystole | 2.29        | 0.55 – 9.55        | 0.255            |
| Received basic life support       | 0.50        | 0.14 – 1.80        | 0.294            |
| Witnessed arrest                  | 0.18        | 0.02 – 1.90        | 0.153            |
| Glucose at admission              | 0.86        | 0.71 – 1.04        | 0.125            |
| pH at admission                   | 0.01        | 0.00 – 2.26        | 0.124            |
| Prior cardiovascular disease      | 0.53        | 0.12 – 2.26        | 0.389            |
| <u>Glasgow coma scale</u>         | <u>0.74</u> | <u>0.63 – 0.87</u> | <u>&lt;0.001</u> |

Only elderly patients ( $\geq 75$  years) were included. The model included 82 patients of which 53 died. Logistic regression:  $R^2=0.37$  (Cox&Snell), 0.51 (Nagelkerke), Hosmer-Lemeshow goodness-of-fit test  $\chi^2$  6.77,  $P=0.562$ . Abbreviations: CI, confidence interval; PEA, pulseless electric activity
